# Supplementary material for: Unsuppressed HIV infection impairs T cell responses to SARS-CoV-2 infection and abrogates T cell cross-recognition
Source: eLife journal article supplement (doi:10.7554/elife.78374), 2022-07-21
Supplement: figures [file elife-78374-figures-v2.pdf]

---

## Figures and figure supplements

Unsuppressed HIV infection impairs T cell responses to SARS-CoV-2 infection and abrogates T cell cross-recognition

**Thandeka Nkosi *et al***

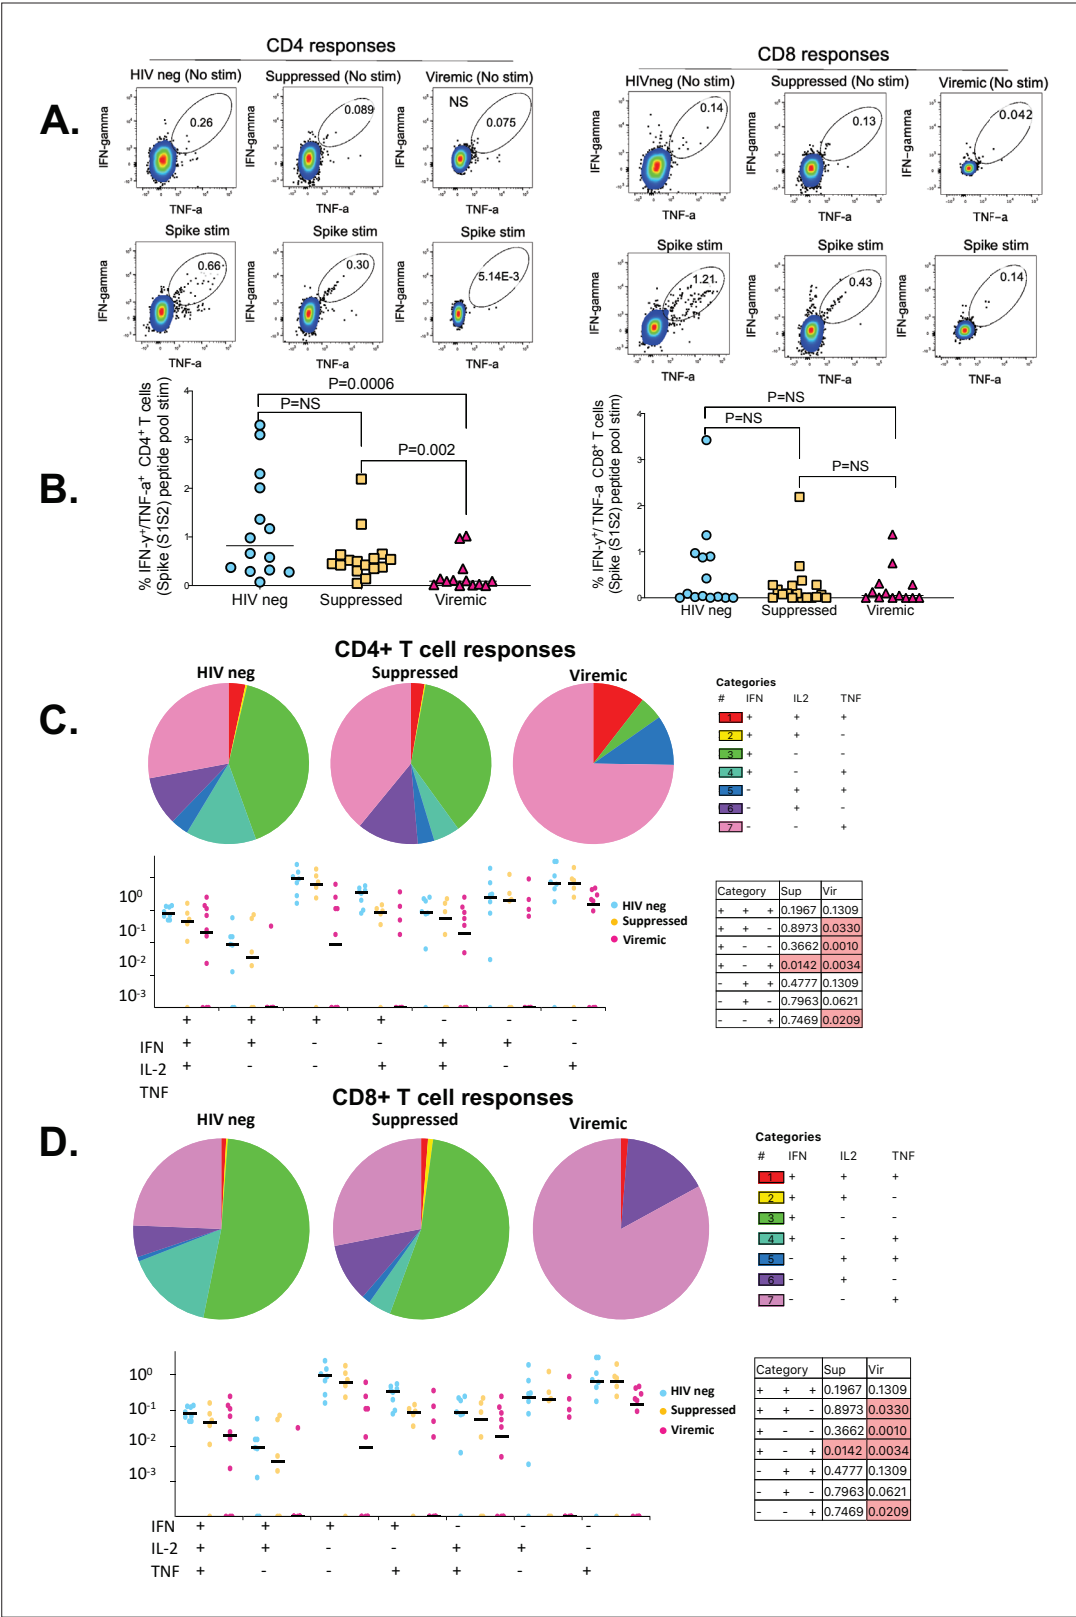

**Figure 1.** The impact of unsuppressed HIV infection on SARS-CoV-2-specific CD4<sup>+</sup> and CD8<sup>+</sup> T cell responses. (A) Representative flowplots gated on IFN- $\gamma$ /TNF- $\alpha$  dual positive CD4<sup>+</sup> and CD8<sup>+</sup> T cells. (B) Aggregate data for IFN- $\gamma$ /TNF- $\alpha$  dual positive CD4<sup>+</sup> and CD8<sup>+</sup> T cells are shown (HIV-neg, n=14; suppressed, n=16; viremic, n=13). SARS-CoV-2-specific CD4<sup>+</sup> and CD8<sup>+</sup> T cells producing IFN- $\gamma$ , TNF- $\alpha$ , and IL-2 cells in various combinations are

Figure 1 continued on next page

*Figure 1 continued*

shown. Pie chart and dot plots for **(C)** SARS-CoV-2-specific CD4<sup>+</sup> and **(D)** CD8<sup>+</sup> T cells. Pie chart represents the mean distribution across subjects of mono-functional, bi-functional, and poly-functional cytokine producing SARS-CoV-2-specific T cells. Size of each pie segment relates to the frequency of a mono-functional, bi-functional, and triple-functional response. Dot plot represents the frequency of combinations of cytokines produced. Wilcoxon test was done among the dot plots using SPICE software (significant p values are highlighted).

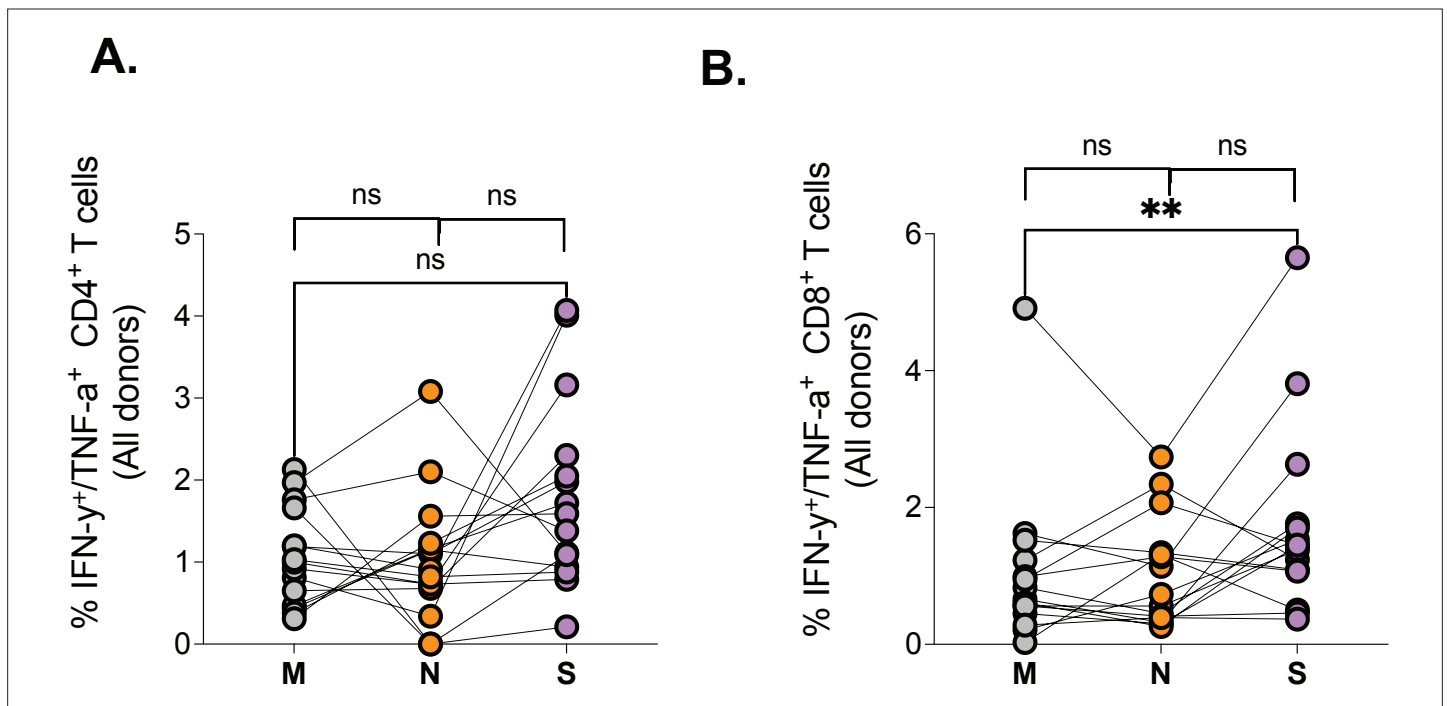

**Figure 2.** Comparison of SARS-CoV-2 protein targeting by T cell responses among HIV-negatives, suppressed and viremic donors. Magnitude of (A) CD4<sup>+</sup> T and (B) CD8<sup>+</sup> T cell responses targeting the Membrane (M), Nucleocapsid (N), and Spike (S) SARS-CoV-2 proteins among study groups. P values for differences among the groups are \* $<0.05$ ; as determined by the Wilcoxon matched-pairs signed rank test (GraphPad Prism version 9.3.0).

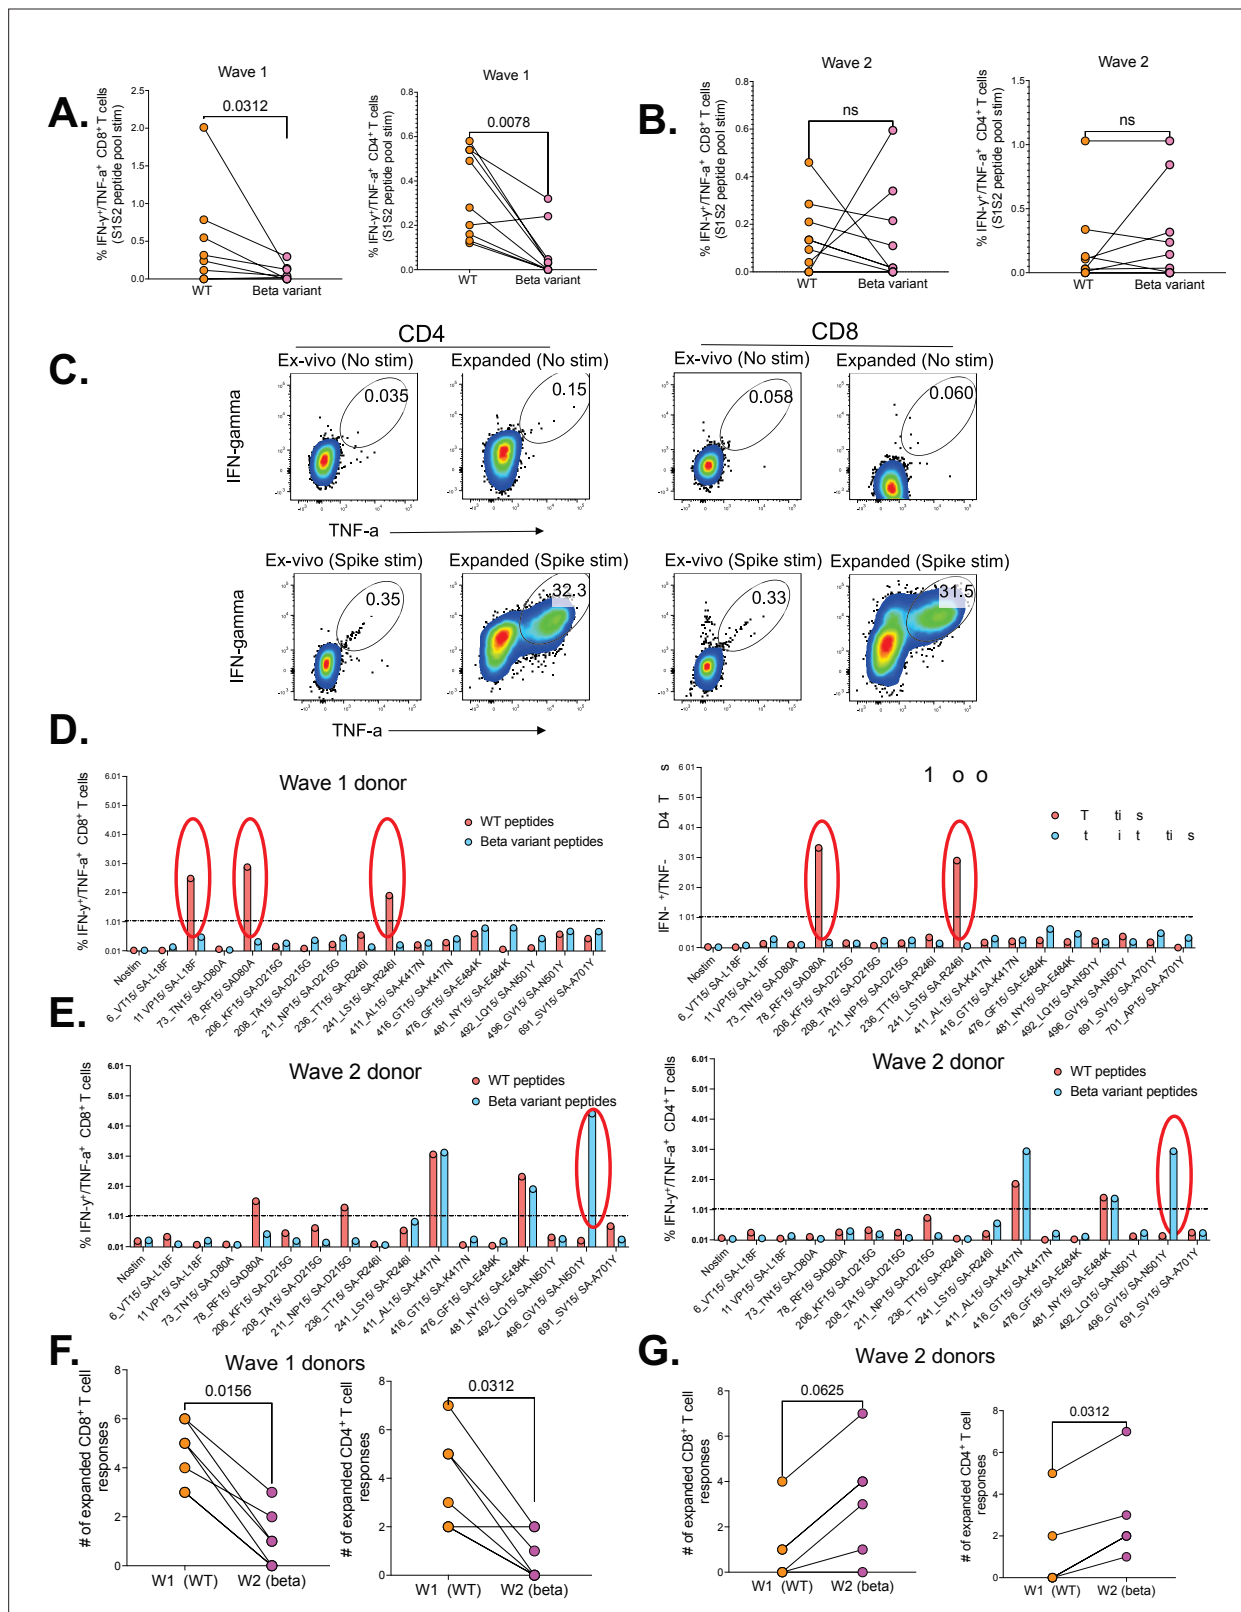

**Figure 3.** Poor cross-recognition of SARS-CoV-2-specific CD4<sup>+</sup> and CD8<sup>+</sup> T cell responses between wt and beta variants in wave 1 and wave 2 COVID-19 participants. Ex vivo assessment of T cell cross-recognition between the two waves. **(A)** Intra-donor SARS-CoV-2-specific T cell responses to wt and corresponding Beta variant peptides by wave 1 participants. **(B)** Intra-donor SARS-CoV-2-specific T cell responses to wt and corresponding Beta variant peptides in wave 2 participants. Next, PBMCs were expanded for 12 days in the presence of S1S2 SARS-CoV-2 peptide pools and tested against wt

Figure 3 continued on next page

*Figure 3 continued*

and corresponding Beta variants at single peptide level. **(C)** Representative flow plots showing the frequency of SARS-CoV-2-specific CD4<sup>+</sup> and CD8<sup>+</sup> T cells before and after cultured expansion. **(D)** T cell responses to single wt (red bars) and corresponding Beta (blue bars) peptide stimulation for a representative donor from wave 1. **(E)** T cell responses to single wt and corresponding Beta peptide stimulation for a representative donor from wave 2 (positive responses are circled). A response was deemed positive if  $\geq 1\%$  or higher. **(F)** Number of expanded wt and corresponding Beta responses for each wave 1 donor. **(G)** Number of expanded wt and corresponding Beta responses for each wave 2 donor. P values calculated using Wilcoxin matched-pairs signed rank T test. PBMC, peripheral blood mononuclear cell; wt, wild-type.

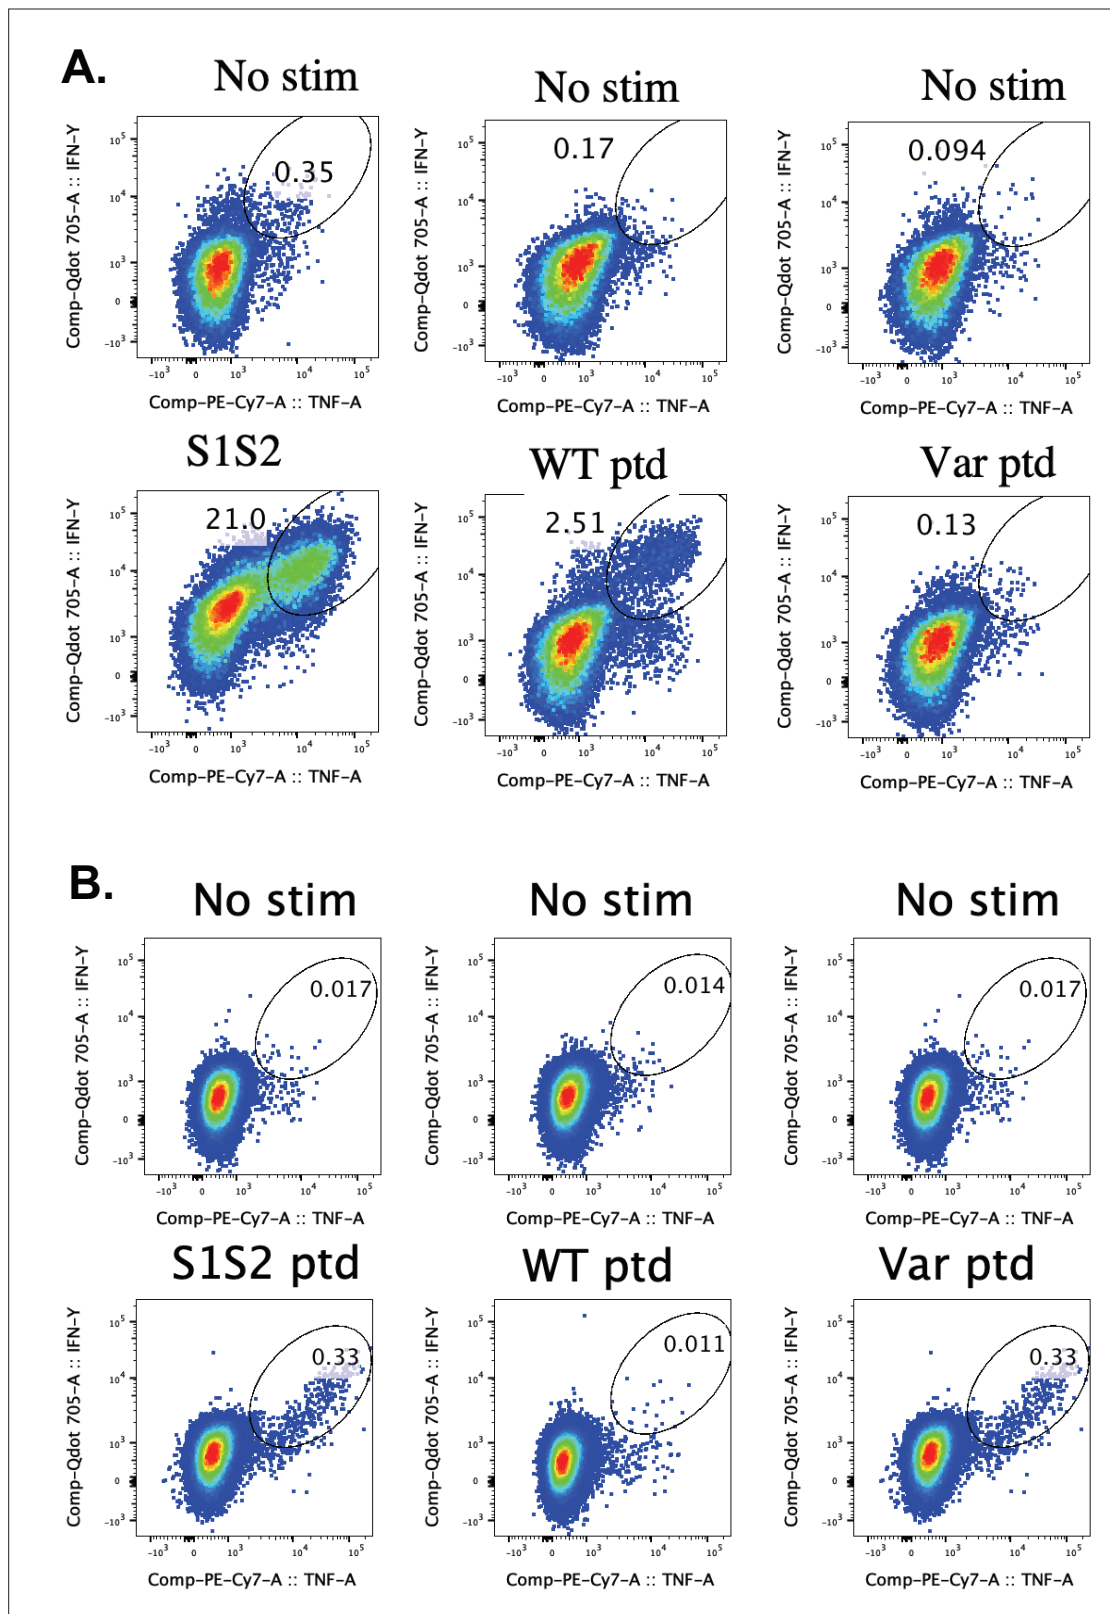

**Figure 3—figure supplement 1.** Cross-recognition of SARS-CoV-2 CD4<sup>+</sup> T cell responses between wt and Beta variants in wave 1 and wave 2 COVID-19 donors: PBMCs were expanded for 12 days in the presence of S1S2 SARS-CoV-2 peptide pools. Expanded cells were tested against wt and corresponding Beta variants at single peptide level. **(A)** Intra-donor SARS-CoV-2-specific T cell responses to wt and corresponding Beta variant peptides by wave 1 participants. **(B)** Intra-donor SARS-CoV-2-specific T cell responses to wt and corresponding Beta variant peptides in wave 2 participants. PBMC, peripheral blood mononuclear cell; wt, wild-type.

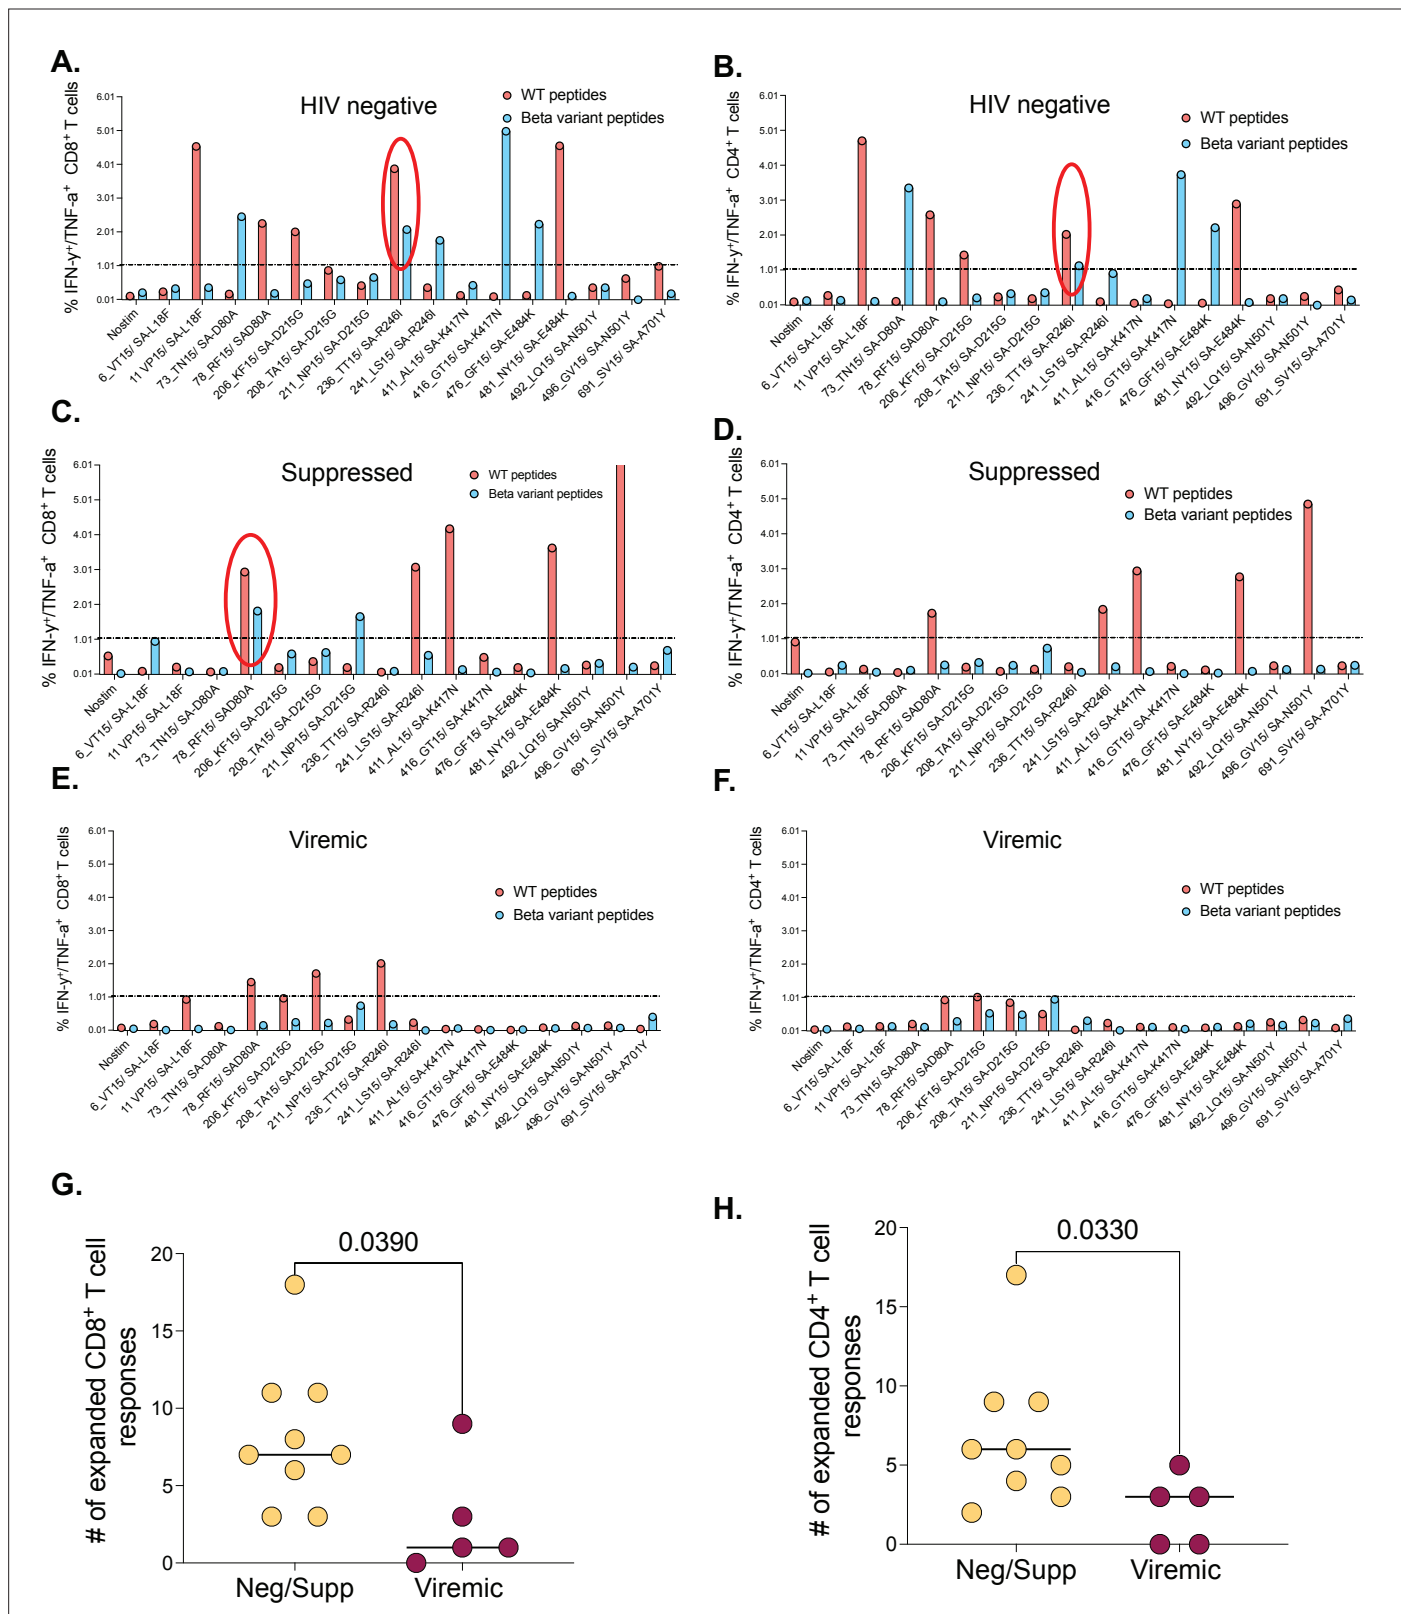

**Figure 4.** The effects of unsuppressed HIV infection on T cell breadth and ability to cross-recognize the Beta variant. Representative data for a negative donor showing greater, (A) CD8<sup>+</sup> and (B) CD4<sup>+</sup> T cell breadth. A cross-recognized responses between wt and Beta is circled. Representative data for a suppressed donor showing greater, (C) CD8<sup>+</sup> and (D) CD4<sup>+</sup> T cell breadth. A cross-recognized response is circled. Representative data for a viremic donor showing greater, (E) CD8<sup>+</sup> and (F) CD4<sup>+</sup> T cell breadth. (G) Aggregate data comparing breath of SARS-CoV-2-specific CD8<sup>+</sup>, and (H) CD4<sup>+</sup> T

Figure 4 continued on next page



*Figure 4 continued*

cell response between HIV-negative and suppressed versus viremics. Breadth here is simply the number of positive responses among the individual peptides tested.

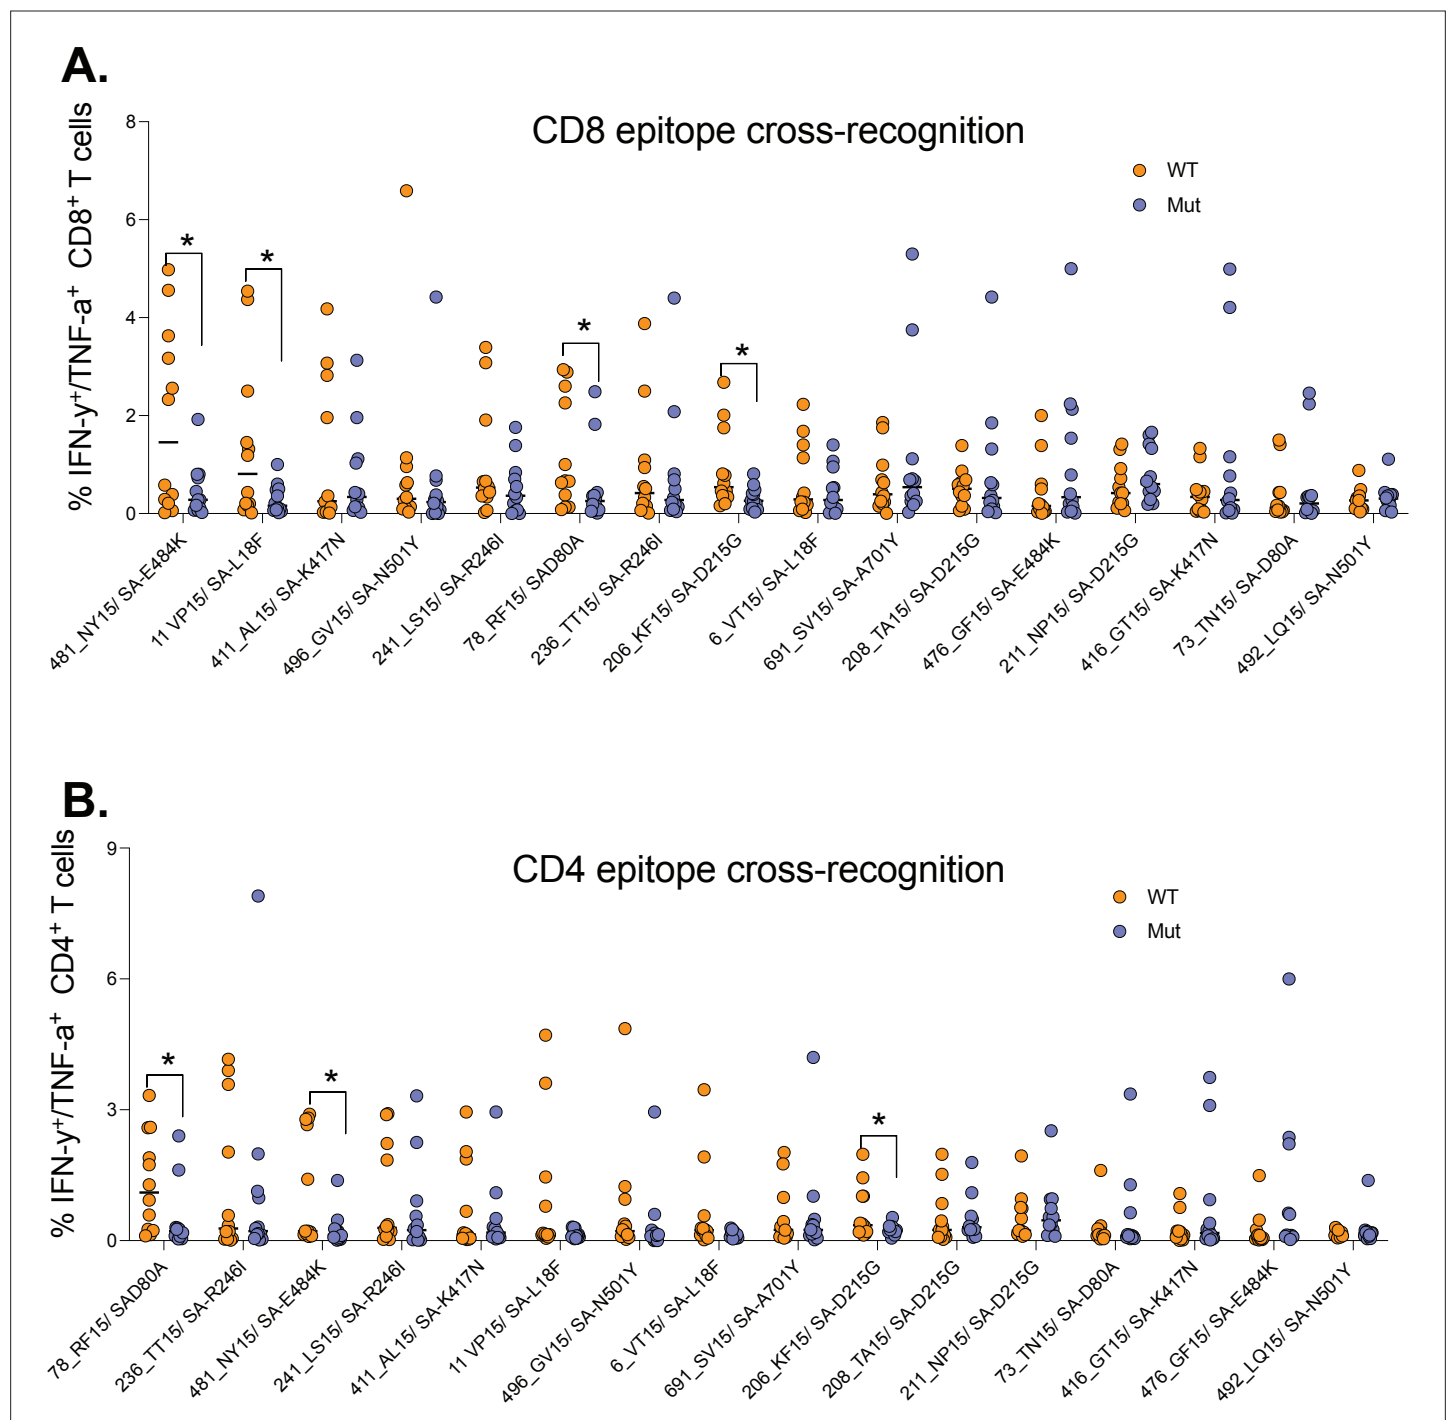

**Figure 5.** Identification of Beta mutations associated with reduced cross-recognition between wt and Beta variant. **(A)** Side-by-side comparison of SARS-CoV-2-specific CD8 $^{+}$  T cell response between wt and Beta. **(B)** Side-by-side comparison of SARS-CoV-2-specific CD4 $^{+}$  T cell response between wt. The analysis combined all the 12 participants. P values calculated by Mann-Whitney U-test. wt, wild-type.

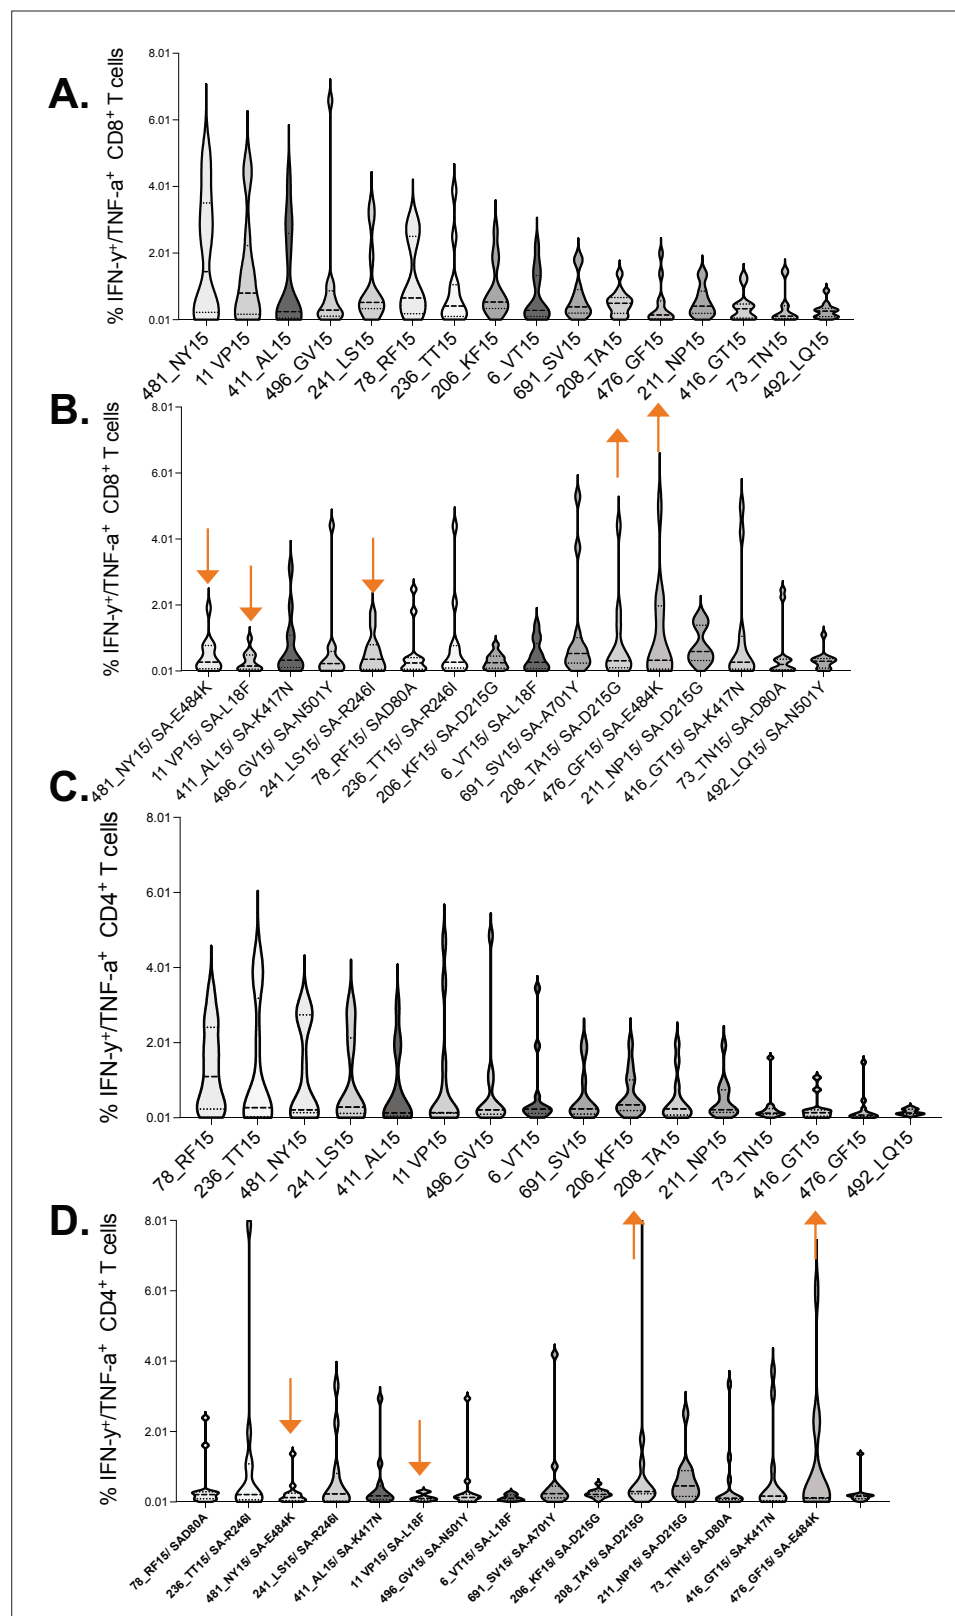

**Figure 6.** Immunodominance hierarchy of SARS-CoV-2 CD8<sup>+</sup> and CD4<sup>+</sup> T cell responses targeting wt and Beta. Immunodominance hierarchy of CD8<sup>+</sup> T cell responses to, (A) wt and (B) the corresponding Beta variant peptides. Similarly, Immunodominance hierarchy of CD4<sup>+</sup> T cell responses to, (C) wt and (D) the corresponding Beta variant. Arrows indicate responses that changed hierarchical position (among the six most dominant responses) between

Figure 6 continued on next page

*Figure 6 continued*

the two waves. Data arranged in descending order of magnitude of responses to wt peptide stimulation. wt, wild-type.

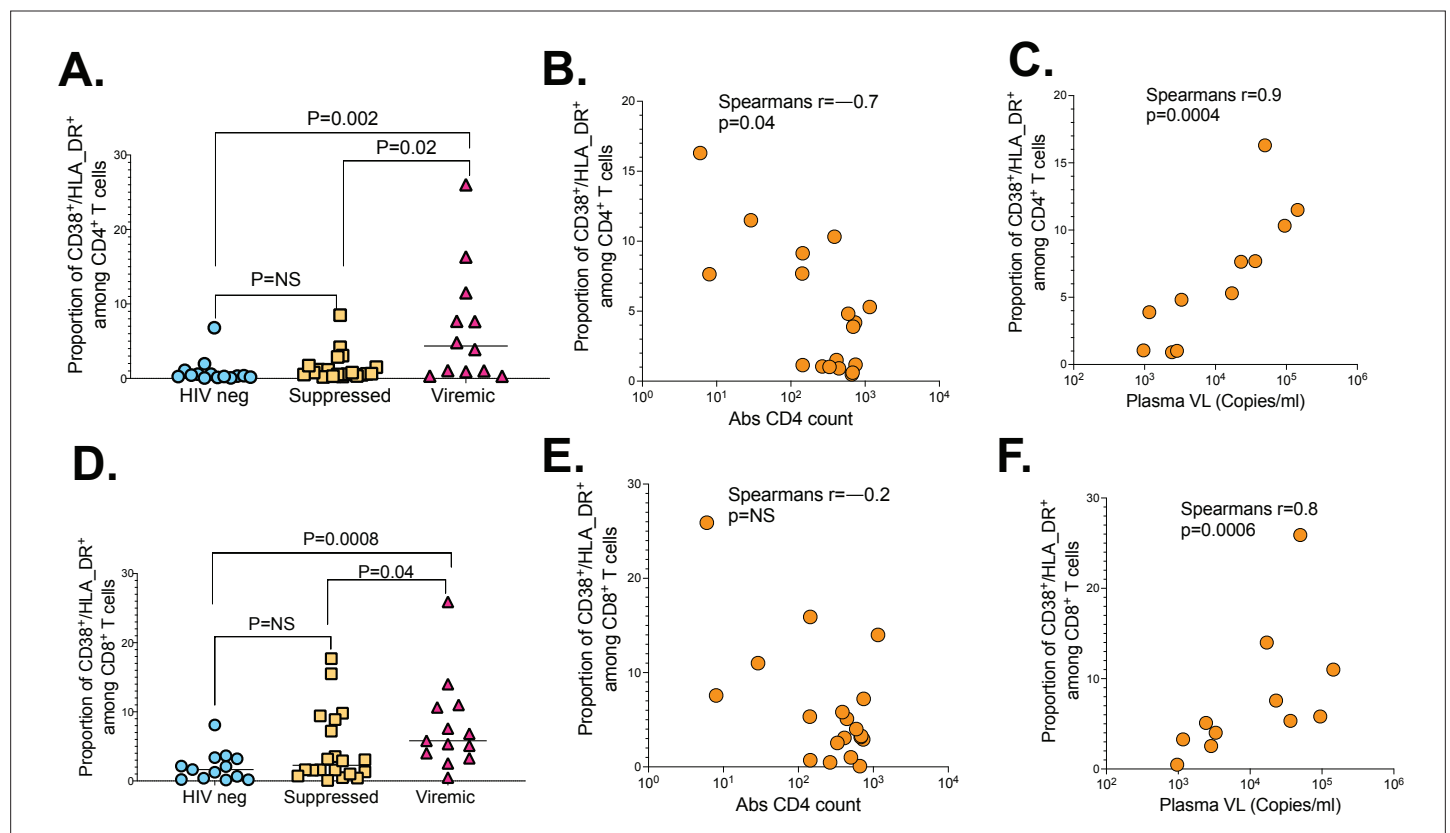

**Figure 7.** The impact of HIV markers of diseases progression on SARS-CoV-2 T cell immunity. **(A)** CD4<sup>+</sup> T cell activation graphed based on the frequency of CD38/HLA-DR co-expressing cells. **(B)** Correlation between CD4<sup>+</sup> T cell activation and absolute CD4 counts of viremic PLWH. **(C)** Correlation between CD4<sup>+</sup> T cell activation and HIV plasma viral load of viremic PLWH. **(D)** CD8<sup>+</sup> T cell activation measured by CD38/HLA-DR. **(E)** Correlation between CD8<sup>+</sup> T cell activation and absolute CD4 counts of viremic PLWH. **(F)** Correlation between CD8<sup>+</sup> T cell activation and HIV plasma viral load of viremic PLWH. P values calculated by Mann-Whitney U-test and Pearson correlation test. PLWH, people living with HIV.

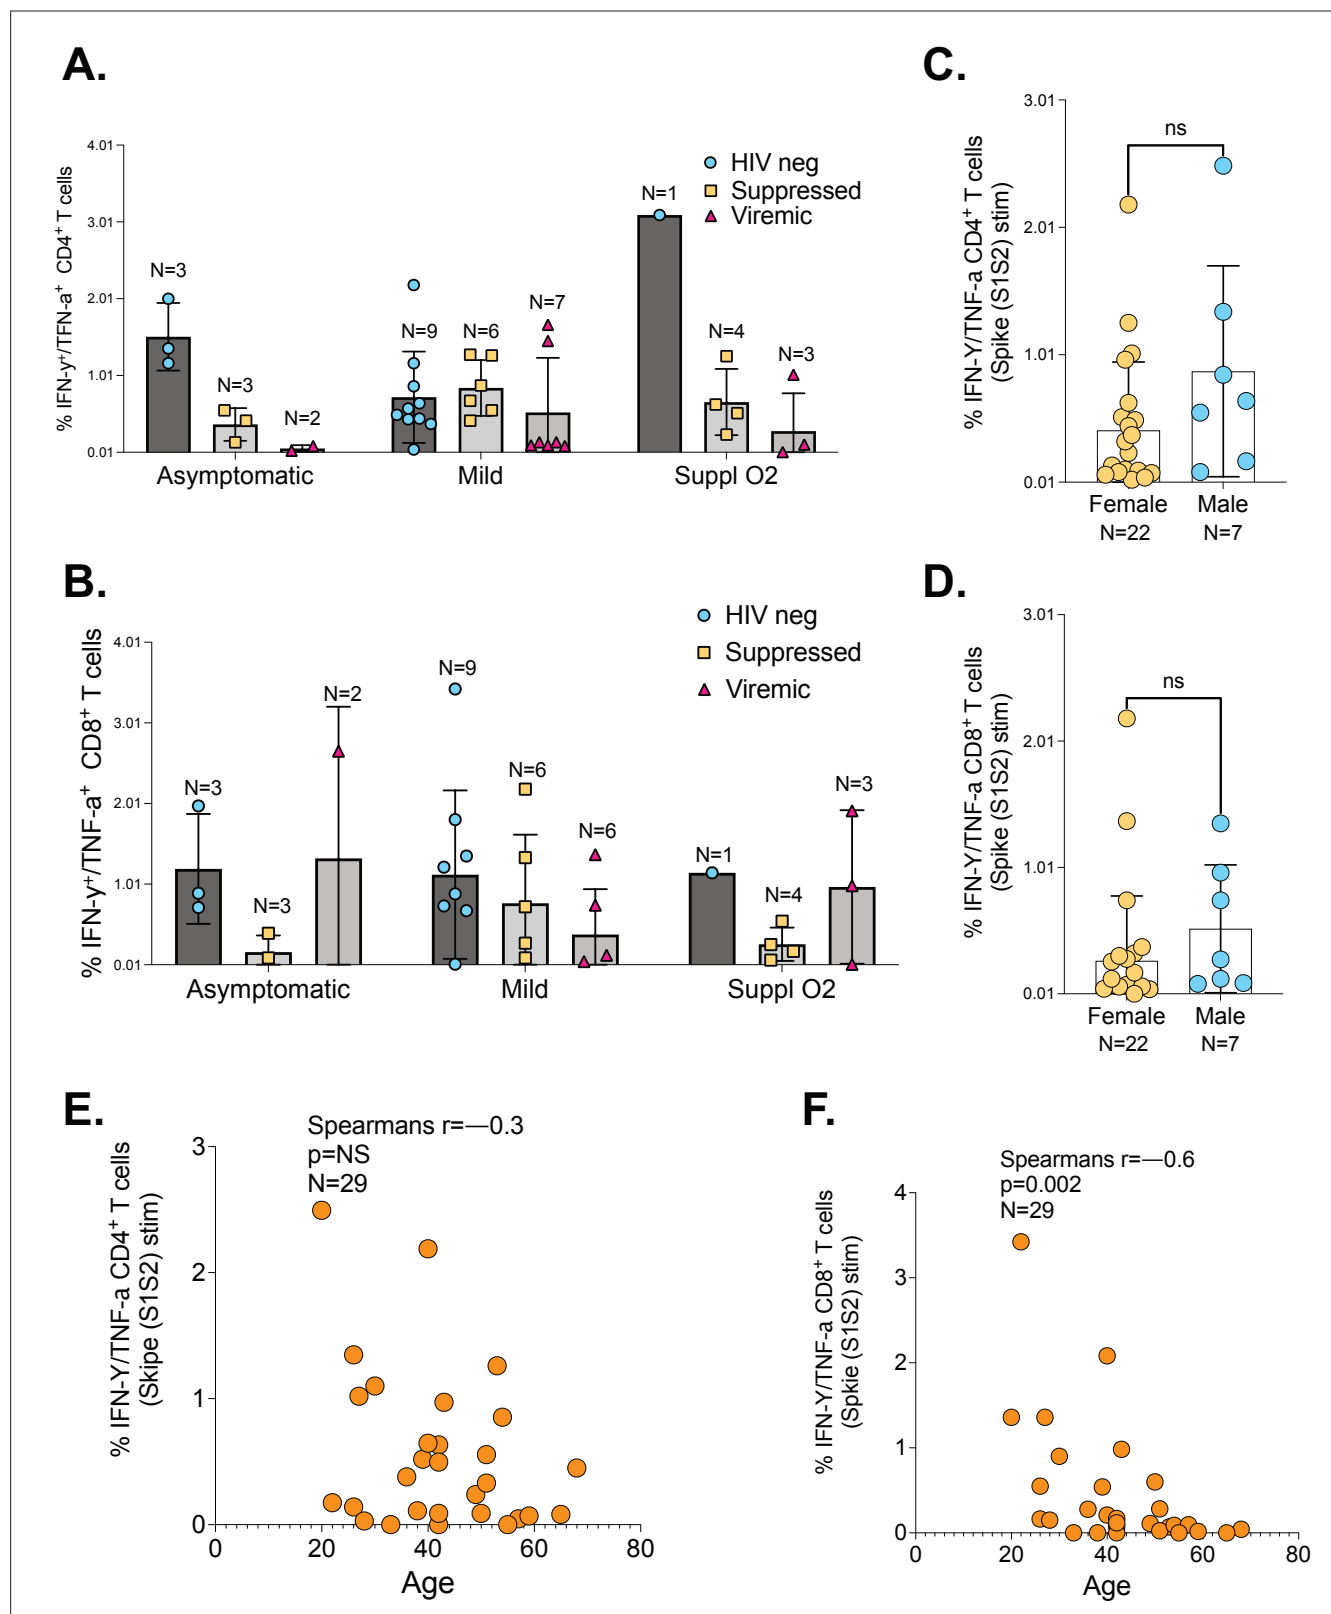

**Figure 7—figure supplement 1.** Assessment of the effect of COVID-19 disease severity on, (A) SARS-CoV-2-specific CD4 $^{+}$ , and (B) CD8 $^{+}$  T cell responses. Disease severity categorised as asymptomatic, mild, and on supplemental oxygen or death. (C, D) Analysis of SARS-CoV-2 responses based on gender. Correlation between age and SARS-CoV-2-specific, (E) CD8 $^{+}$ T and (F) CD4 $^{+}$  T cell responses. P values calculated by Mann-Whitney U-test and Pearson correlation test.
