# Supplementary figures and images for: Unsuppressed HIV infection impairs T cell responses to SARS-CoV-2 infection and abrogates T cell cross-recognition
Source: eLife journal article supplement (doi:10.7554/elife.78374), 2022-07-21

Figure 3- Figure supplement 1

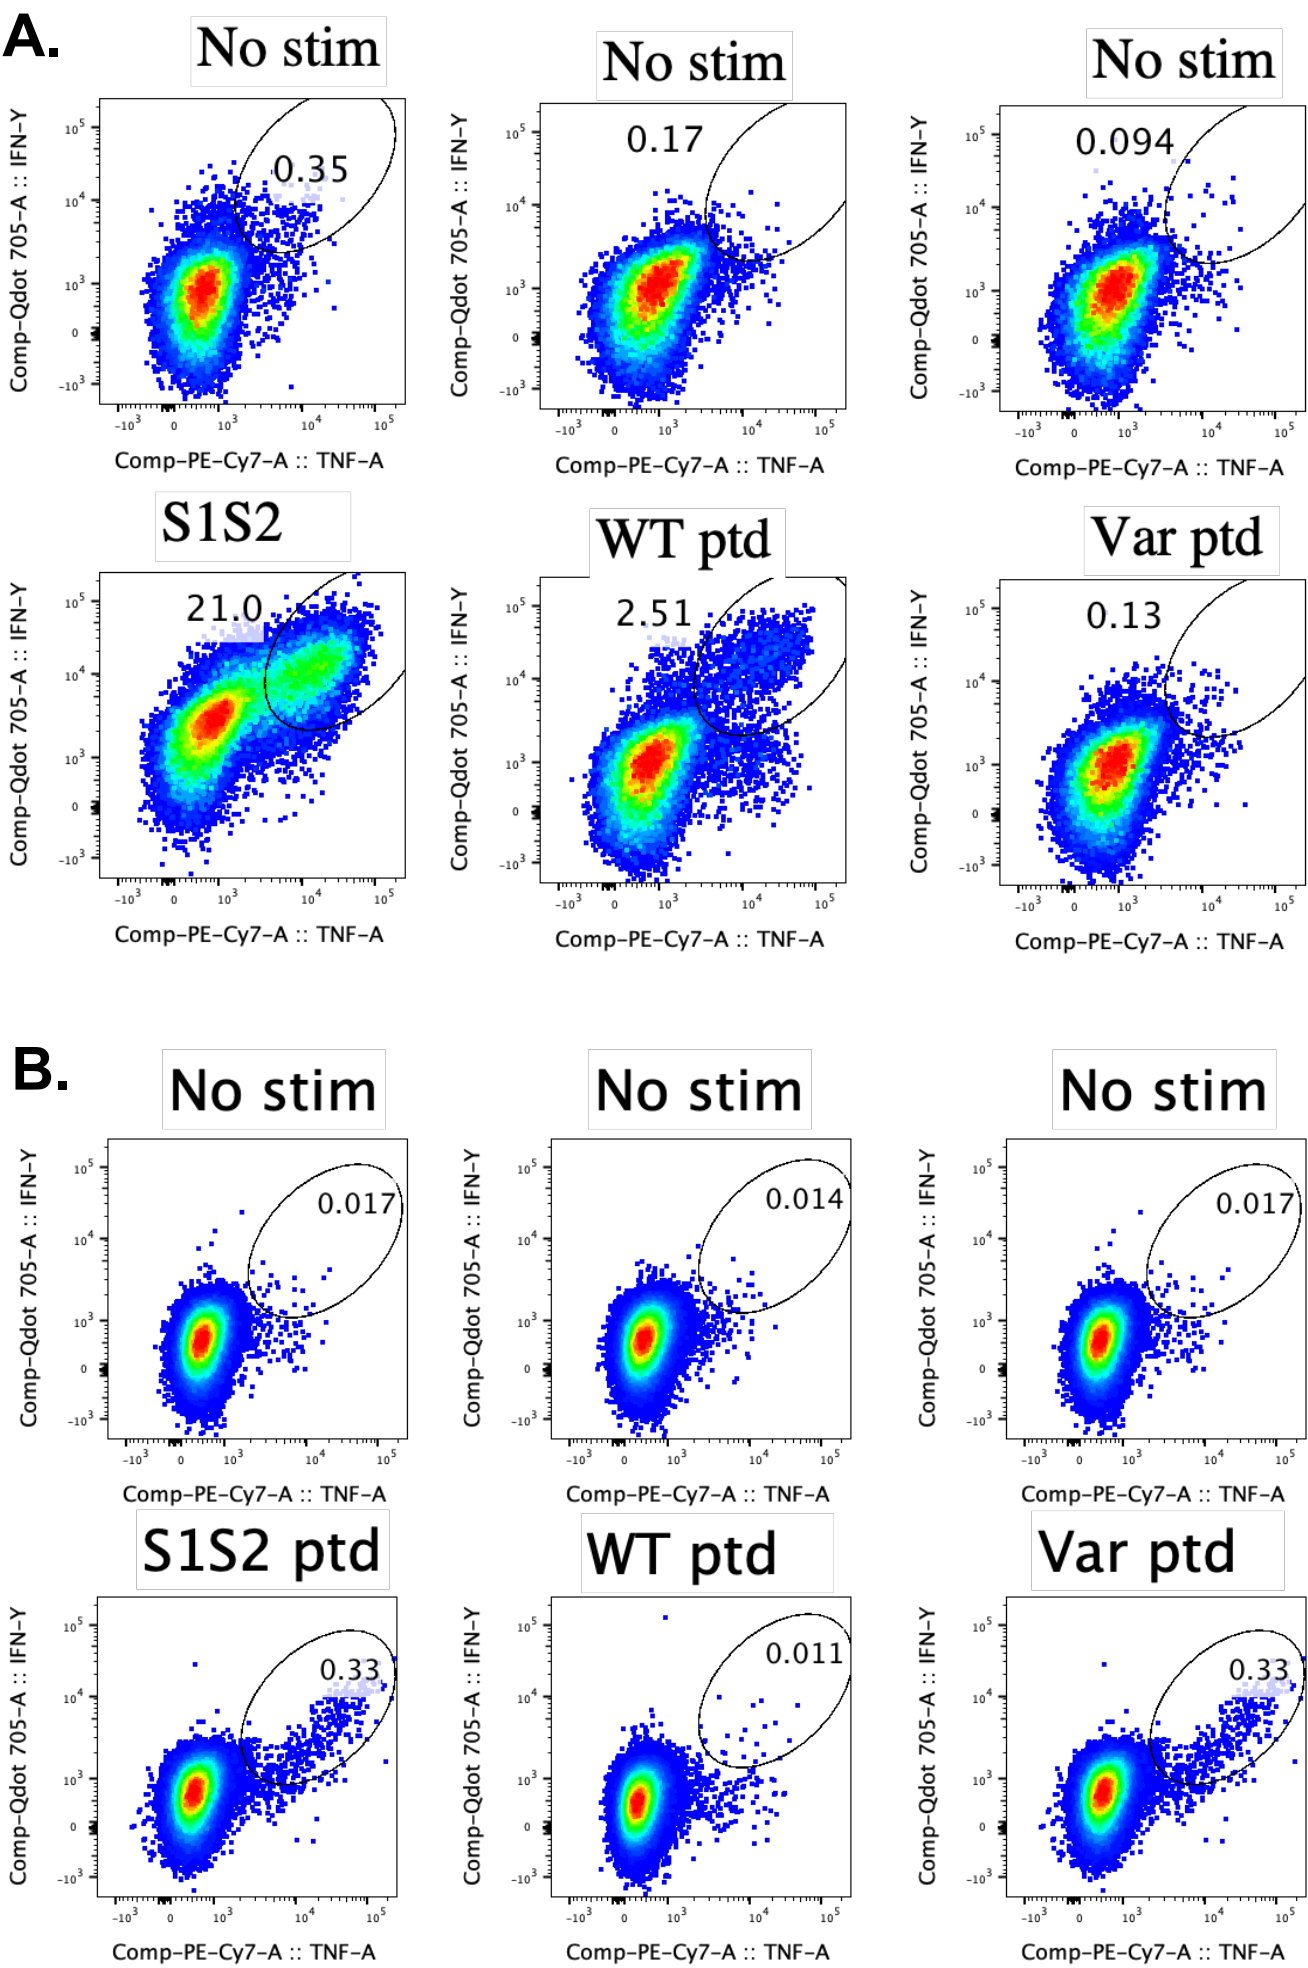

Supplement: supp [file elife-78374-supp-v1.zip]

# Figure 7-figure supplement 2

**A.**

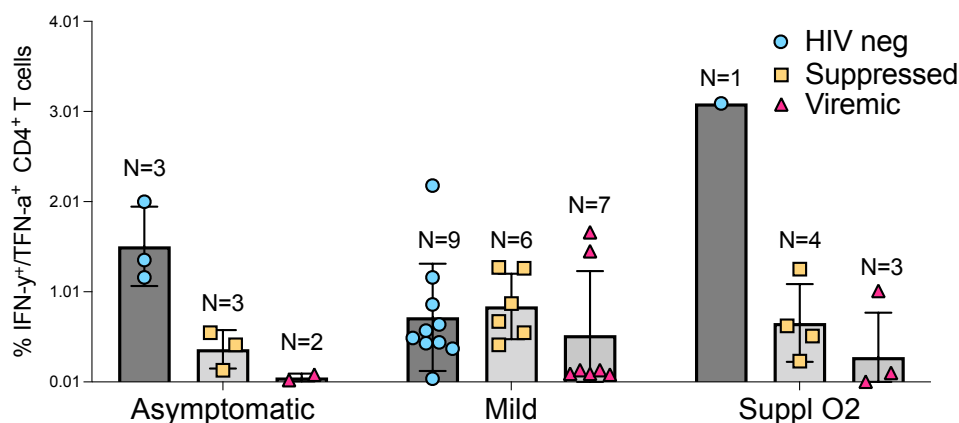

**C.**

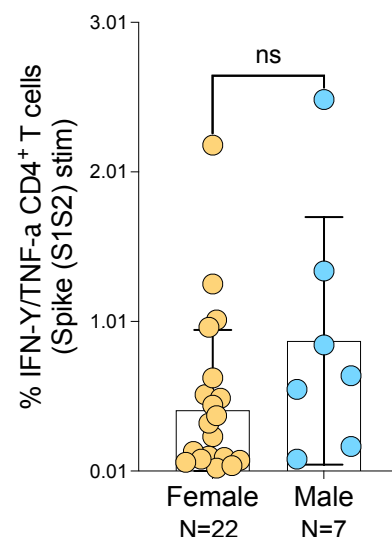

**B.**

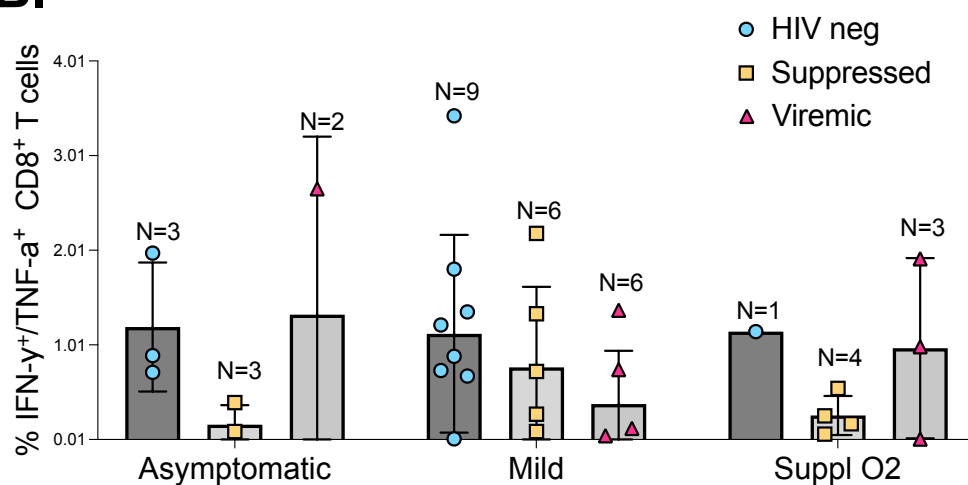

**D.**

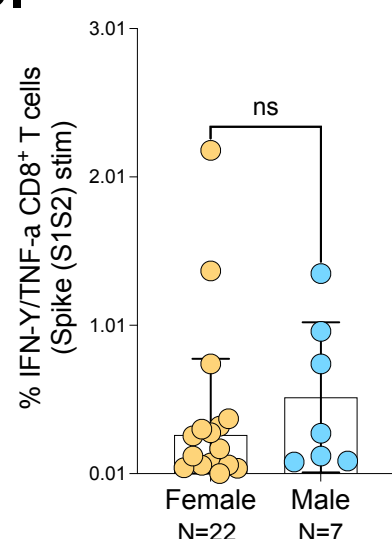

**E.**

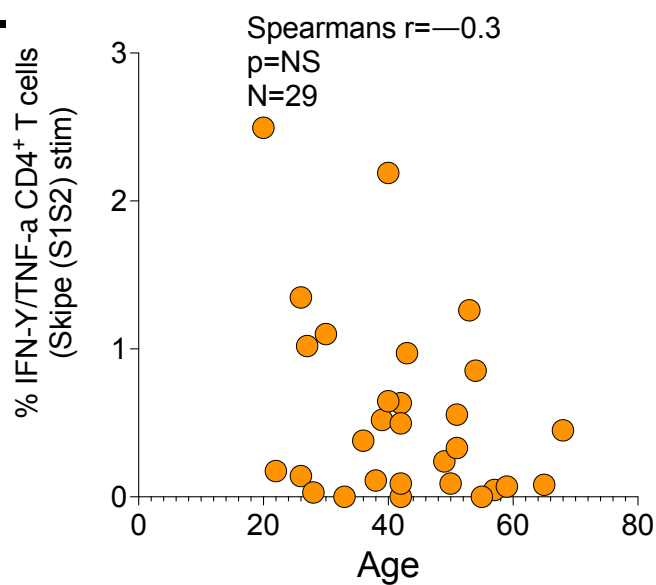

**F.**

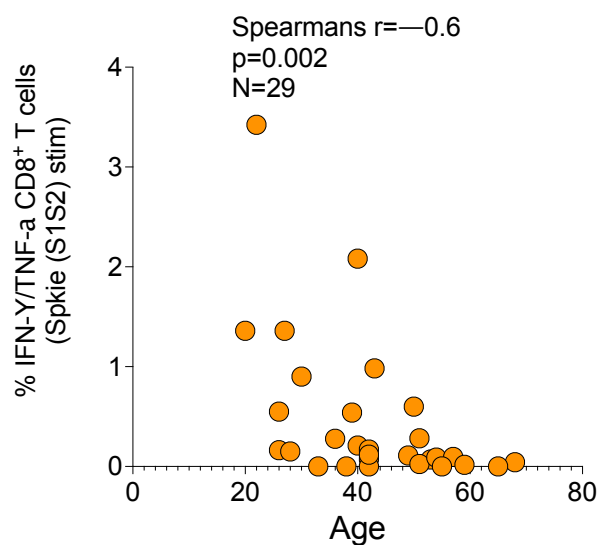

Supplement: supp [file elife-78374-supp-v1.zip]
